# Supplementary material
Source: PubMed Central journal article supplement (PMC4959483)
Supplement: AEM.03811-15_zam999117088so1.pdf [file AEM.03811-15_zam999117088so1.pdf]

Supplemental Table S1. Edo-containing contig information obtained per each of the positive clones. The lengths of the contigs are as submitted to database. Note that after assembly in some cases full length fosmid sequences were obtained. However, in other cases the genes encoding full-length Edo proteins were detected in short contigs.

| Clone | Length (bp) | Clone | Length (bp)  |
|-------|-------------|-------|--------------|
| UPO33 | 13791       | UPO60 | 9934         |
| UPO34 | 913         | UPO61 | 28786        |
| UPO35 | 31941       | UPO64 | 38849        |
| UPO36 | 35754       | UPO65 | 876          |
| UPO37 | 23169       | UPO66 | 876          |
| UPO38 | 29023       | UPO67 | 22358 + 7552 |
| UPO40 | 913         | UPO68 | 27688        |
| UPO41 | 24654       | UPO69 | 903          |
| UPO42 | 39546       | UPO71 | 35472        |
| UPO43 | 29470       | UPO72 | 3101         |
| UPO44 | 903         | UPO74 | 6907         |
| UPO45 | 25634       | UPO75 | 24720        |
| UPO46 | 31338       | UPO76 | 32228        |
| UPO47 | 30346       | UPO77 | 903          |
| UPO48 | 870         | UPO78 | 25399        |
| UPO49 | 4502        | UPO79 | 903          |
| UPO50 | 29235       | UPO80 | 903          |
| UPO51 | 2545        | UPO85 | 903          |
| UPO52 | 3101        | UPO86 | 903          |
| UPO53 | 34769       | UPO87 | 27688        |
| UPO54 | 21209       | UPO88 | 876          |
| UPO55 | 3101        | UPO89 | 13989        |
| UPO57 | 22424       | UPO90 | 8035         |
| UPO58 | 3101        | UPO91 | 4555         |

Supplemental Table 2. Metagenomic *edo* genes and clone(s) harbouring them.

| gene                     | clone                            | gene                       | clone                   |
|--------------------------|----------------------------------|----------------------------|-------------------------|
| <i>edoA</i> <sub>1</sub> | UPO36                            | <i>edoQ</i> <sub>1</sub>   | UPO37<br>UPO60<br>UPO89 |
| <i>edoA</i> <sub>2</sub> | UPO47                            | <i>edoQ</i> <sub>2</sub> * | UPO74                   |
| <i>edoA</i> <sub>3</sub> | UPO43                            | <i>edoQ</i> <sub>3</sub> * | UPO65                   |
| <i>edoB</i> <sub>1</sub> | UPO68<br>UPO87                   | <i>edoQ</i> <sub>4</sub> * | UPO66                   |
| <i>edoB</i> <sub>2</sub> | UPO67                            | <i>edoQ</i> <sub>5</sub> * | UPO88                   |
| <i>edoB</i> <sub>3</sub> | UPO51                            | <i>edoR</i>                | UPO61                   |
| <i>edoC</i> <sub>1</sub> | UPO49<br>UPO50                   | <i>edoS</i> <sub>1</sub>   | UPO69<br>UPO79<br>UPO80 |
| <i>edoC</i> <sub>2</sub> | UPO35                            | <i>edoS</i> <sub>2</sub>   | UPO44<br>UPO85          |
| <i>edoC</i> <sub>3</sub> | UPO46                            | <i>edoS</i> <sub>3</sub>   | UPO91                   |
| <i>edoC</i> <sub>4</sub> | UPO38                            | <i>edoS</i> <sub>4</sub>   | UPO77                   |
| <i>edoC</i> <sub>5</sub> | UPO33                            | <i>edoS</i> <sub>5</sub>   | UPO86                   |
| <i>edoD</i> <sub>1</sub> | UPO52<br>UPO55<br>UPO58<br>UPO72 | <i>edoT</i>                | UPO76                   |
| <i>edoD</i> <sub>2</sub> | UPO78                            | <i>edoU</i>                | UPO53                   |
| <i>edoF</i>              | UPO71                            | <i>edoV</i>                | UPO42                   |
| <i>edoG</i>              | UPO57                            | <i>edoW</i>                | UPO34<br>UPO40          |
| <i>edoH</i>              | UPO41                            | <i>edoX</i> <sub>1</sub>   | UPO67                   |
| <i>edoO</i> <sub>1</sub> | UPO90                            | <i>edoX</i> <sub>2</sub>   | UPO51                   |
| <i>edoO</i> <sub>2</sub> | UPO54                            | <i>edoY</i> <sub>1</sub>   | UPO64                   |
| <i>edoO</i> <sub>3</sub> | UPO75                            | <i>edoY</i> <sub>2</sub>   | UPO64                   |
| <i>edoO</i> <sub>4</sub> | UPO48                            | <i>edoY</i> <sub>3</sub>   | UPO45                   |
| <i>edoP</i>              | UPO45                            |                            |                         |

\* These *edo* genes are very similar and encode the same enzyme denoted EdoQ<sub>2</sub>.
